# Supplementary material for: Multiparameter investigation of bulk heterojunction organic photovoltaics
Source: Royal Society of Chemistry journal article supplement (doi:10.1039/c7ra07673h), 2017-01-01
Supplement: c7ra07673h1.pdf [file c7ra07673h1.pdf]

## Supporting Information

### Multiparameter investigation of bulk heterojunction organic photovoltaics

Chiara Musumeci,<sup>a</sup> Riccardo Borgani,<sup>b</sup> Jonas Bergqvist,<sup>a</sup> Olle Inganäs,<sup>a</sup> David Haviland.<sup>b</sup>

<sup>a</sup>Biomolecular and Organic Electronics, IFM, Linköping University, 58183 Linköping, Sweden.

<sup>b</sup>Nanostructure Physics, KTH Royal Institute of Technology, 10691 Stockholm, Sweden.

e-mail: [oling@ifm.liu.se](mailto:oling@ifm.liu.se); [haviland@kth.se](mailto:haviland@kth.se).

### Comparison of multiple quantities

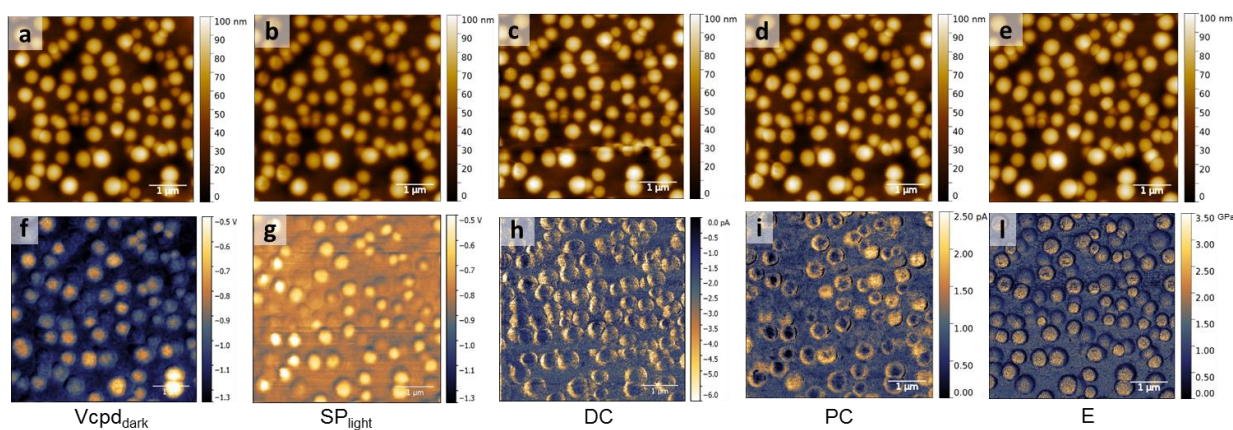

Figure S1. Comparison of multiple quantities measured on the same area of a TQ1:PCBM blend deposited on ZnO/ITO from toluene: (a-e) height images; (f) contact potential in dark and (g) in light; (h) dark current measured at a bias of -2V applied to the ITO electrode; (i) photocurrent measured at 0V bias; (l) elastic modulus map.

## Determination of contact area

The contact area between tip and sample was determined based on Hertz model describing the contact between a sphere and a half-space.

For small indentations the contact area is<sup>1</sup>:

$$A = 2\pi r_{tip} \left( r_{tip} - \sqrt{r_{tip}^2 - r_c^2} \right),$$

where  $r_{tip}$  is the probe radius,  $r_c$  the contact radius, and  $\left( r_{tip} - \sqrt{r_{tip}^2 - r_c^2} \right) = \frac{r_c^2}{r_{tip}} = h$  is the indentation depth.

The contact radius is:

$$r_c = \sqrt[3]{\frac{3 \cdot F \cdot r_{tip}}{4 \cdot E^*}},$$

being  $F$  the load force and the reduced modulus  $E^* = \left( \frac{1-\nu_s^2}{E_s} + \frac{1-\nu_{tip}^2}{E_{tip}} \right)^{-1}$ , with  $\nu_s$  and  $\nu_{tip}$  the Poisson ratios and  $E_s$  and  $E_{tip}$  the elastic modulus of sample and tip, respectively.

Assuming  $E_{tip} \rightarrow \infty$  and a Poisson ratio of 0.35,<sup>2</sup> we estimate the following contact areas corresponding to the current maps in Fig 2 and Fig 5 for applied load forces of 10 nN.

| Probe (Figure)            | $r_{tip}$ | $r_c$  | A                   |
|---------------------------|-----------|--------|---------------------|
| ElectriCont-G (Figure 2)  | 25 nm     | 5.2 nm | 167 nm <sup>2</sup> |
| HQ:DPE-XSC11/C (Figure 5) | 40 nm     | 6.0 nm | 228 nm <sup>2</sup> |

Table S1. Tip radius ( $r_{tip}$ ), contact radius ( $r_c$ ) and contact area (A) of the different probes used for current mapping in C- and QI-mode.

## Current density maps

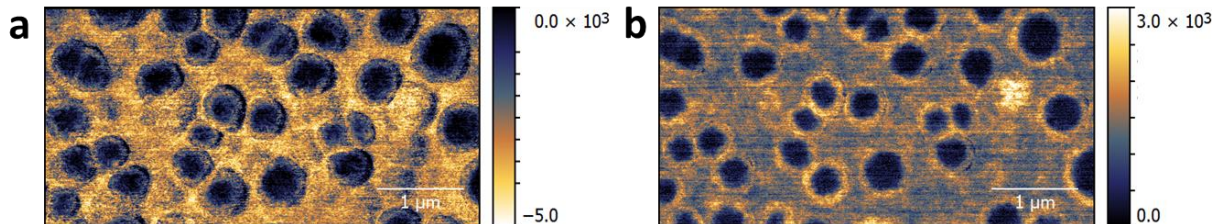

Figure S2. Current density maps (mA/cm<sup>2</sup>) in dark (a) and upon light irradiation (b) calculated from the current maps in Figure 2, considering a tip-sample contact area of 167 nm<sup>2</sup>.

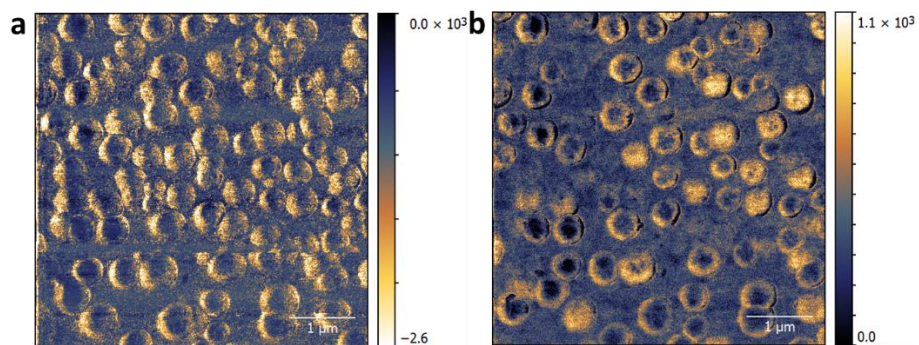

Figure S3. Current density maps ( $\text{mA}/\text{cm}^2$ ) in dark (a) and upon light irradiation (b) calculated from the current maps in Figure 5, considering a tip-sample contact area of  $228 \text{ nm}^2$ .

## References

1. D. Moerman, N. Sebaihi, S. E. Kaviyil, P. Leclere, R. Lazzaroni and O. Douheret, *Nanoscale*, 2014, **6**, 10596-10603.
2. S. E. Root, S. Savagatrup, C. J. Pais, G. Arya and D. J. Lipomi, *Macromolecules*, 2016, **49**, 2886-2894.
